# Supplementary material
Source: publisher figshare collection journal article supplement (https://frontiersin.figshare.com/ndownloader/files/33078296)
Supplement: Supplementary file 1 [file 33078296]

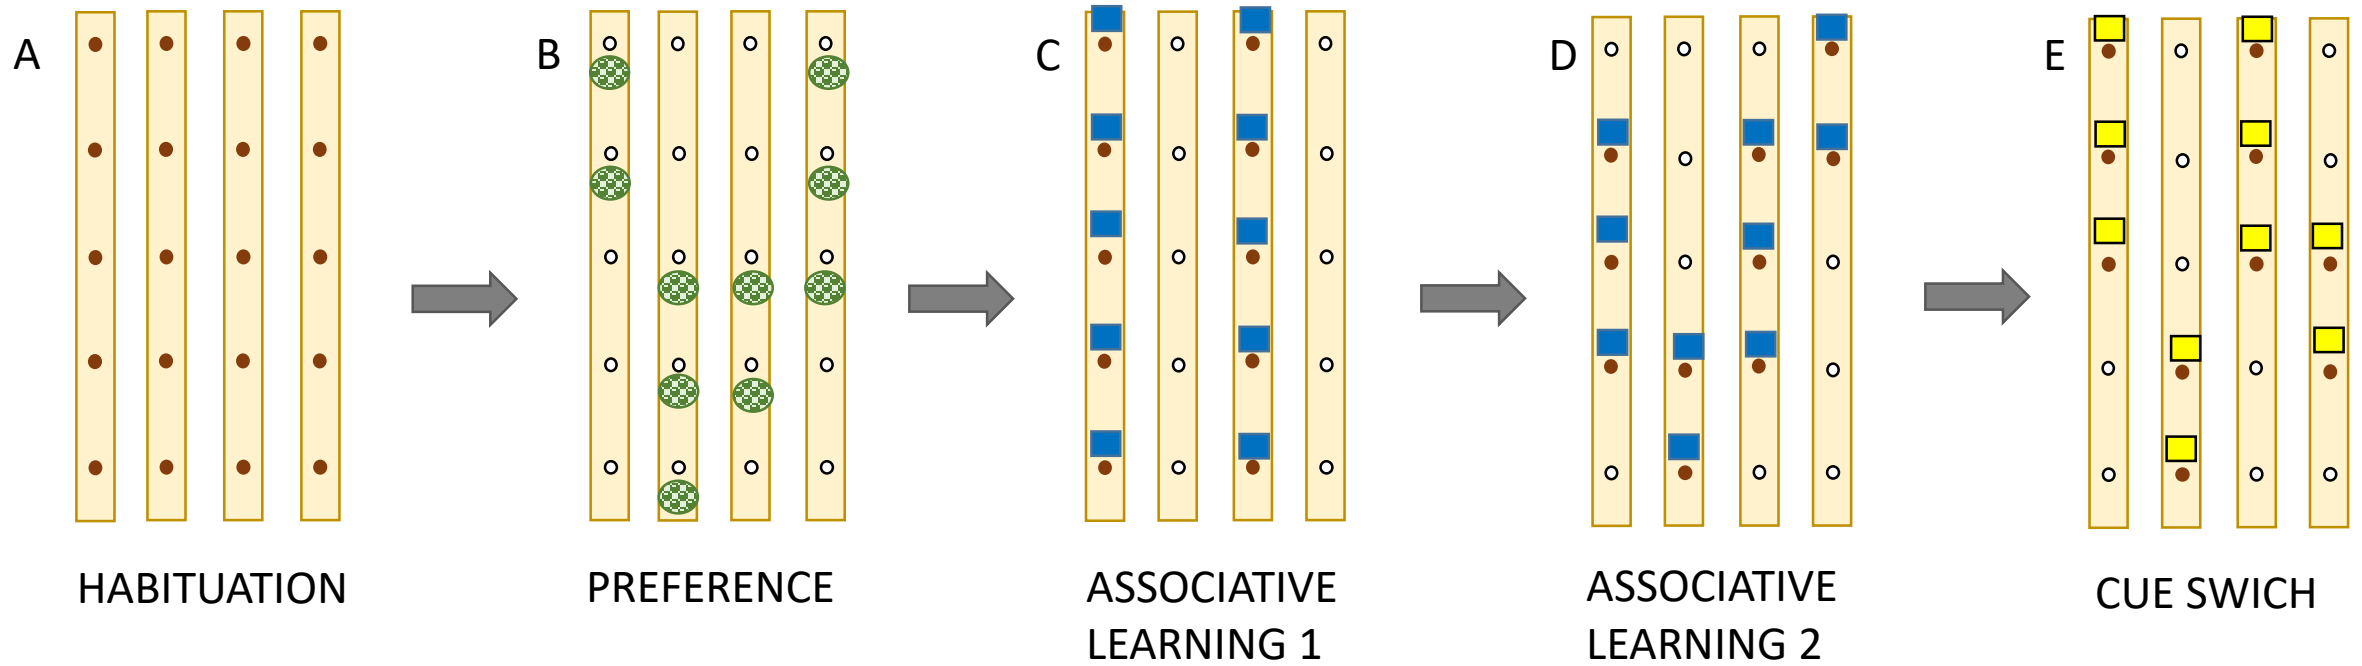

Figure S3. Foraging arena setup for the different stages of training that great tits had to pass: A – habituation, B – odour preference test, C – associative learning, first stage (visual cue example), D – associative learning, second stage (visual cue example), E – switching to a new cue (visual cue example). Four artificial arena trees are shown with 5 foraging holes in each; brown circles=baited holes, white circles=empty holes. Placement of pellet bags with olfactory cues illustrated with green ovals under the holes and placement of visual cues illustrated with blue or yellow rectangles above the holes. Control hole covers (visual cues) or pellet bags (olfactory cues) are not shown for clarity. The hole covers were first open and then closed during A, and closed during all subsequent stages.
